# Supplementary material for: The mechanism of Gejie Zhilao Pill in treating tuberculosis based on network pharmacology and molecular docking verification
Source: Front Cell Infect Microbiol. 2024 Jul 2;14:1405627. doi: 10.3389/fcimb.2024.1405627 (PMC11250621; doi:10.3389/fcimb.2024.1405627)
Supplement: Supplementary file 4 [file DataSheet_4.xlsx]

## Sheet: Sheet1
Serial number	GeneID
1	SLC11A1
2	IFNG
3	MTBS1
4	IFNGR1
5	TNF
6	TLR2
7	CISH
8	MTBSX
9	IL10
10	IL12RB1
11	MAPKAPK3
12	LOC129936806
13	MTBS2
14	MTBS3
15	CD209
16	CD81-AS1
17	CD244
18	MIR3945HG
19	HLA-DRB1
20	IL12B
21	INHA
22	ADA
23	NAT2
24	CCL2
25	STAT1
26	ALB
27	CRP
28	VDR
29	MBL2
30	TLR4
31	IL6
32	GNLY
33	CXCL10
34	IL2
35	IL1B
36	IL4
37	IL18
38	SP110
39	LINC01672
40	CD4
41	IFNGR2
42	CYBB
43	P2RX7
44	CXCL8
45	IL17A
46	HLA-DQB1
47	NOD2
48	TIRAP
49	CCL3
50	GPT
51	CYP2E1
52	TLR9
53	TMX2-CTNND1
54	LOC117307477
55	LINC02605
56	MRC1
57	CYP2B6
58	HLA-A
59	TLR1
60	IL2RA
61	CD8A
62	HSPD1
63	CLEC7A
64	CCL4
65	B2M
66	IRGM
67	HSPE1
68	MIR889
69	ACE
70	SP140
71	TGFB1
72	MIF
73	HP
74	CD14
75	CAMP
76	CXCL9
77	CYP3A4
78	CXCR3
79	RPS12
80	CCL5
81	CXCR4
82	GSTM1
83	GLUL
84	CERNA3
85	MYD88
86	DTYMK
87	CD1B
88	TLR6
89	RORC
90	HLA-B
91	CYP51A1
92	MIR21
93	NOS2
94	IL7
95	MMP9
96	GSTT1
97	F2
98	ESX1
99	CD86
100	TAP1
101	IRF1
102	GC
103	MIR155
104	FN1
105	TST1
106	TST2
107	PDE6B
108	MMP1
109	ABCB1
110	CEACAM5
111	MIR223
112	CD1C
113	LAMP1
114	PDCD1
115	PDF
116	GZMB
117	C3
118	HLA-DQA1
119	SOCS1
120	TNFRSF1A
121	STAT3
122	CAT
123	CCR7
124	CD69
125	ITGAM
126	MASP2
127	H19
128	IL5
129	NADK
130	MIR144
131	ADK
132	RNF213
133	AFP
134	CP
135	CCR5
136	CD1A
137	IL1RN
138	GLYATL1
139	BMP6
140	LTA4H
141	ISG15
142	SERPINA1
143	TBP
144	CD80
145	TYK2
146	IL1A
147	PGM1
148	TLR5
149	CTSG
150	IL15
151	IL13
152	IFI44L
153	ADPGK
154	SELL
155	PRF1
156	IFNAR1
157	SOD2-OT1
158	LTF
159	CLEC4M
160	TF
161	HLA-DRB3
162	CSF2
163	IL22
164	CD40LG
165	MAPK14
166	ICAM1
167	EMSLR
168	PSG2
169	HAVCR2
170	ARL8B
171	LTA
172	IFNB1
173	SLX1A-SULT1A3
174	SOD1
175	VPS33B
176	FAS
177	MIR125A
178	DYNC2H1
179	CACNA1G-AS1
180	NFKB1
181	LOC119266102
182	STAT2
183	IRF9
184	ILVBL
185	TNFRSF8
186	LACTB
187	FOXP3
188	CD274
189	PSMB8
190	ALPP
191	LOC126862536
192	CD28
193	NLRP3
194	EPX
195	KRT19
196	TAP2
197	GGT1
198	PPIG
199	NR1I2
200	IL1R1
201	SERPINC1
202	PTPRC
203	HLA-DRB5
204	SFTPA1
205	IL32
206	CTLA4
207	AGER
208	BTNL2
209	RAB7A
210	AGTR1
211	CASP1
212	MAPK1
213	SIGIRR
214	SOCS3
215	TIMP1
216	ZNF740
217	SLCO1B1
218	IL17F
219	ACR
220	PDCD1LG2
221	CORO1A
222	SLC17A5
223	WT1
224	JAK1
225	MIR142
226	HLA-DRA
227	MUC16
228	HMOX1
229	SFTA3
230	PTPN22
231	GAPDH
232	PPARG
233	HLA-E
234	ICOS
235	SNORD15A
236	LINC01554
237	CYP27B1
238	IFIT3
239	IL23A
240	IL12RB2
241	CD79A
242	MPO
243	VEGFA
244	SLC26A6
245	CD40
246	HLA-DPB1
247	IL23R
248	IL27
249	CBS
250	CLRN2
251	FASLG
252	TRC-GCA24-1
253	SFTPA2
254	LEP
255	MIR642A
256	MMP7
257	NPPB
258	ASAP1
259	GLO1
260	GZMA
261	ATP12A
262	TRA-TGC7-1
263	MC3R
264	CREB1
265	SFPQ
266	MIR320A
267	ZNFX1
268	KLK3
269	OAS1
270	GBP1
271	XCL1
272	DEFA1
273	EDNRB
274	CXCR1
275	ROCR
276	TOLLIP
277	CXCL12
278	BCL2
279	AKT1
280	FASN
281	RAB20
282	UBC
283	TNFRSF1B
284	SLAMF1
285	PRTN3
286	CXCR2
287	CTSZ
288	MIR146A
289	MEG3
290	SFTPD
291	ERVW-1
292	CSF3
293	GP2
294	IFNAR2
295	TLR8
296	SH2D1A
297	IFNA2
298	TLR10
299	LYZ
300	DDN
301	CYRIB
302	ELANE
303	SLC35A2
304	CASP3
305	TMEM50B
306	CYP2C9
307	TBX21
308	LARS1
309	LINC00870
310	IL7R
311	ALOX5
312	REL
313	MAP3K7
314	FCGR1A
315	CYP2C8
316	BPI
317	RELA
318	MIR451A
319	ENSG00000262094
320	LINC01857
321	TRD-GTC9-1
322	RAB5A
323	TXN
324	GSK3A
325	TRIM27
326	TAX1BP1
327	CR1
328	MCL1
329	CEACAM7
330	F3
331	HMGB1
332	IFIT1B
333	PLG
334	IGKC
335	IGHG2
336	PTX3
337	RPSA
338	DHFR
339	ITGAL
340	SCAT1
341	MX1
342	IFIT1
343	ENO2
344	ACTA2
345	DIAPH1
346	GUCY1A1
347	CLEC1A
348	RNF213-AS1
349	MYMY1
350	IL9
351	MIR29A
352	CYP2D6
353	MIR17
354	DUSP14
355	HSD17B8
356	CYBA
357	IGHE
358	CD68
359	SPP1
360	FOXO3
361	IL2RB
362	PLAT
363	XPO1
364	MAPK3
365	MARCO
366	HGS
367	HLA-C
368	PHGDH
369	TAC1
370	CYP2C19
371	CLEC4E
372	HAMP
373	POMC
374	CCL1
375	CGAS
376	MIR378A
377	ATP4A
378	LGALS9
379	KRIT1
380	MIR140
381	G6PD
382	CASP8
383	HLA-DQB2
384	CCL8
385	HLA-DRB4
386	EMB
387	TRN-GTT2-1
388	ANXA1
389	SLPI
390	HSP90AA1
391	LAMP2
392	IFNA1
393	JUN
394	ACP1
395	ATP6V1H
396	EXOSC10
397	ITGB2
398	HSPA4
399	MR1
400	GATA3
401	CD27
402	LINC-ROR
403	ARG1
404	MIRLET7E
405	IL37
406	GRP
407	REN
408	DUSP16
409	JUP
410	SNORD118
411	MIR150
412	TAB3
413	MMP3
414	MIR16-2
415	CD163
416	JAK2
417	PTPN2
418	CCR3
419	RNU6-1
420	EDNRA
421	TUB
422	NRL
423	CFC1
424	GLIS3
425	NT5C1B
426	NT5C1B-RDH14
427	PLA2G2A
428	SIGLEC1
429	FCGR3A
430	MIR22
431	CASC8
432	ACACA
433	CD247
434	ULK1
435	DEFB4A
436	MICA
437	CCR1
438	RBP4
439	CDKN3
440	MIR30C1
441	IL11
442	SP1
443	STAT4
444	TRD
445	MIR486-2
446	TNFSF15
447	CLEC12A
448	FCGR2A
449	FTSJ1
450	CTDSP1
451	PSMB9
452	HIF1A
453	MIRLET7G
454	IL26
455	IL12A
456	C1QA
457	ESD
458	TNFRSF9
459	SLC11A2
460	BTLA
461	SLC29A1
462	RALA
463	FBL
464	SNRNP70
465	MIR486-1
466	IRF8
467	TRAF6
468	LY96
469	CEBPB
470	ITGB1
471	CLEC6A
472	SLC40A1
473	MIR125B1
474	SOD2
475	DNAH8
476	EREG
477	HCN4
478	AGXT
479	GPT2
480	SCUBE2
481	TRAFD1
482	FBXL8
483	LINC01262
484	MIR4322
485	TREM1
486	SLCO2A1
487	TREM2
488	IRAK1
489	CCL18
490	OGDH
491	CCL11
492	MMP8
493	MIR7-3HG
494	LOC654780
495	PIAS1
496	IFITM1
497	IFI35
498	MIRLET7B
499	FZD5
500	NR1H2
501	IGES
502	MIR423
503	GSTP1
504	FDXR
505	CIITA
506	MIR582
507	IDO1
508	LEPQTL1
509	RIPK2
510	CDH13
511	STXBP5
512	AHCYL2
513	PARD3B
514	ZNF229
515	FCGR1BP
516	CYP1A1
517	VCAM1
518	MMP2
519	WNT5A
520	MSLN
521	CALCA
522	LBP
523	MIR30C2
524	SNORD44
525	HSP90B1
526	MIR193A
527	LMNA
528	TGFB3
529	TTN
530	NR3C2
531	RYR2
532	DSC2
533	DSG2
534	PKP2
535	DSC3
536	CTNNA3
537	TMEM43
538	CFHR5
539	PPP2R3C
540	CFHR2
541	ITIH2
542	CUTA
543	CUZD1
544	MIR4659B
545	MIR4713
546	NCF2
547	RAB4B-EGLN2
548	RLBP1
549	RBP3
550	EBI3
551	CFTR
552	ADCY10
553	CPT2
554	TUBG1
555	KCNT1
556	UNC80
557	MT-CYB
558	CCR6
559	LILRB1
560	MIR483
561	MIR23A
562	MAF
563	LCN2
564	BAG6
565	NCR1
566	GLDC
567	MIR125B2
568	ITGAX
569	CXCL2
570	SNORD46
571	MAP3K5
572	MPP1
573	GSR
574	IL1RAPL2
575	MIR32
576	LAG3
577	HSPA8
578	FH
579	TNFSF13B
580	KLRG1
581	NALT1
582	MSRA
583	GBP5
584	S100A12
585	KLRD1
586	CCAT1
587	MIR93
588	AGTR2
589	RPS4XP18
590	NFE2L2
591	CCR2
592	CTSD
593	PRKN
594	CCL20
595	SNORD104
596	PEPD
597	EEA1
598	TADA2A
599	ITGA5
600	UBE3A
601	MMP12
602	CS
603	DHPS
604	PACRG
605	HLA-G
606	IL33
607	MMP10
608	NEAT1
609	TP53
610	NCF1
611	EPAS1
612	CR2
613	KLK4
614	GNE
615	CTDP1
616	PPCS
617	LRBA
618	NDUFA5
619	CYGB
620	CES3
621	CTRB1
622	TIMM10
623	NAT9
624	FEZF2
625	CTRB2
626	WDFY2
627	MIR4523
628	MIR4536-1
629	IL21
630	SFRP1
631	NOTCH4
632	CD5L
633	B3GAT1
634	C11orf87
635	MIR146B
636	RPS27A
637	HSPA1A
638	SLCO1B3
639	UNG
640	MIR20B
641	FZD6
642	PLCD1
643	RSPO4
644	MFN2
645	TOX
646	IL36G
647	MIR132
648	CD36
649	TNC
650	SLC22A5
651	SLC22A4
652	MIRLET7D
653	MIR193B
654	MIR370
655	MIR28
656	MIR450A2
657	MIR2110
658	MIR1246
659	NFKBIL1
660	CMPK1
661	ATF2
662	CXCL1
663	USP18
664	MAPK8
665	CAMK2G
666	ITGA4
667	LIPA
668	NQO1
669	ABCA1
670	CYP1A2
671	KPNB1
672	PIK3CA
673	DLD
674	IL1R2
675	CRAT
676	NR2C2
677	SMAD5-AS1
678	RETN
679	SPN
680	MIR33B
681	RAB5C
682	MIR155HG
683	NELFCD
684	HGF
685	DROSHA
686	PDE3B
687	WFDC2
688	HFE
689	PROCR
690	PKP3
691	ANO9
692	MIR342
693	BDNF-AS
694	PTPN6
695	LGALS3
696	MIR20A
697	RAD50
698	KIF3A
699	SEPTIN8
700	PRL
701	SLC7A11
702	CD53
703	POSTN
704	LINC02224
705	MFHAS1
706	LRRK2
707	SIRT1
708	RNF187
709	ESRRB
710	TGM6
711	SH3RF2
712	TLR3
713	TIMP3
714	VIM
715	CD63
716	MIR302A
717	MIR4732
718	S100A8
719	HAUS6
720	HDAC1
721	PLA2G4A
722	ADIPOQ
723	NR1H3
724	MYBBP1A
725	DEFA3
726	RMRP
727	MIR197
728	MIR671
729	MDH2
730	MAGI1
731	KIR3DS1
732	TSC2
733	CD34
734	CARD9
735	IKBKG
736	CCN2
737	EPO
738	PF4
739	MIR708
740	STX6
741	GATA6
742	MC4R
743	RBBP8
744	GLRX5
745	CABLES1
746	CTAGE1
747	C6orf118
748	PARAIL
749	LOC101928446
750	RPL6P14
751	PTGER4
752	NPC2
753	LGALS8
754	HULC
755	MIR215
756	ANXA5
757	SERPINB9
758	MIR26A2
759	PCED1B-AS1
760	INE1
761	HCG27
762	ENO1
763	FTO
764	IMPA1
765	DBT
766	MIAT
767	TRG
768	HMGCR
769	AKR1A1
770	FCN2
771	OSM
772	EGF
773	PIK3R1
774	CHIT1
775	IRAK4
776	PRKCZ
777	CCL15
778	MIR296
779	ADAM17
780	PDE4A
781	GCLC
782	SERPINA3
783	S100A9
784	SCGB1A1
785	SERPINB1
786	BPIFA1
787	ZXDC
788	TGFBR1
789	PDP1
790	NNT
791	VAMP3
792	CCL3L1
793	IRX2-DT
794	MIR34C
795	MIR196B
796	MIR221
797	PWAR4
798	MIR4286
799	MIRLET7C
800	HDAC6
801	IL6R
802	DCN
803	PYCARD
804	NKRF
805	FMO2
806	PLAUR
807	EEF1A1
808	PTK2B
809	IDH1
810	POR
811	H6PD
812	NLRP12
813	DEFB1
814	CCL27
815	KLRB1
816	SERPINF2
817	ASAH2
818	HLA-DQA2
819	HLA-DQB1-AS1
820	HLA-DRB6
821	ATG16L1
822	CTSW
823	ENSG00000196893
824	TNFSF11
825	TNFRSF11B
826	PPM1A
827	NORAD
828	NT5E
829	LEPR
830	CASP9
831	GPI
832	PON1
833	IGF2R
834	TCIRG1
835	SOD3
836	PTPN3
837	NR2E3
838	DLEU2
839	GSTT1-AS1
840	HNF1A-AS1
841	ABCB11
842	NOTCH1
843	TYMS
844	TBK1
845	RAB11A
846	IL17D
847	CASP10
848	EGFR
849	MIRLET7A1
850	MIR29C
851	ANXA3
852	BAX
853	AMACR
854	VDAC1
855	CARD16
856	UGT1A
857	MIR941-4
858	ROCK1
859	MIR325
860	ORM1
861	BECN1
862	UGT2B7
863	CXCL11
864	CTNNB1
865	IL3
866	MIR502
867	PNP
868	TGIF1
869	CCR4
870	PLCG2
871	LIG1
872	PTS
873	MB
874	COASY
875	GFER
876	IL10RA
877	AICDA
878	CNKSR1
879	MIR424
880	MIR522
881	NME4
882	VPS33A
883	CES2
884	LINC01550
885	LINC00926
886	ABCG2
887	CYP21A1P
888	CYP7A1
889	BMAL1
890	RBKS
891	MIR346
892	MIR106A
893	SLC2A1
894	DUOX2
895	CTSB
896	SAA1
897	TNFSF8
898	TGFBR2
899	NFKBIA
900	ZAP70
901	HPRT1
902	TAB2
903	TRAF1
904	CARD8
905	CXCL17
906	SCARNA5
907	METTL3
908	LRP2
909	CUBN
910	MMUT
911	PRDM1
912	UBASH3B
913	TRE-TTC3-1
914	MIR448
915	DNAJB1P1
916	TSC22D3
917	PGK1
918	UBB
919	KPNA1
920	UBA52
921	MIR183
922	SAMHD1
923	TAT
924	MICB
925	CYCS
926	FUT2
927	TRAF2
928	ICAM3
929	ATG4C
930	ATG9B
931	TENT5A
932	DEFA4
933	MTOR
934	JAK3
935	CYP11A1
936	PRDX6
937	MARS1
938	ENSG00000254325
939	KIR2DL1
940	MMP14
941	SIRT3
942	PCK2
943	S100A4
944	FIBP
945	GAB2
946	CD226
947	HCST
948	XIST
949	MIR26A1
950	CARMN
951	LINC01085
952	MIR500A
953	MT-CO3
954	MIR660
955	CBL
956	XDH
957	SIRPA
958	TRIM25
959	FCGR3B
960	PITRM1
961	BORCS5
962	PSORS1C3
963	VKORC1
964	ETFDH
965	ABCB7
966	DUT
967	VPS11
968	CDIPT
969	CCN6
970	RAB14
971	TRIM14
972	MIR185
973	MIR31HG
974	MIR542
975	MIR147B
976	MIR769
977	DSCAM
978	RPN2
979	TPI1
980	SIN3A
981	PECAM1
982	CD160
983	ZBTB25
984	DEFB103B
985	PSD2-AS1
986	NCF4
987	DUOX1
988	ARRB2
989	MBP
990	MALAT1
991	SNCA
992	IL18R1
993	ARPC1B
994	IL24
995	DHX36
996	GPR183
997	SIGLEC14
998	TSBP1-AS1
999	PTEN
1000	XIAP
1001	EIF2AK3
1002	THBD
1003	AADAC
1004	TNFRSF18
1005	COLEC11
1006	MPC1
1007	MPC2
1008	SNHG16
1009	MIR1293
1010	TRP-TGG3-1
1011	RNU6-1228P
1012	OTX2P1
1013	RNASE3
1014	MAP2K1
1015	ADRB2
1016	TNKS2
1017	PLEK
1018	IL22RA1
1019	SAA4
1020	CUL9
1021	RIDA
1022	MTHFR
1023	AVP
1024	CALB2
1025	MIR106B
1026	RAF1
1027	NCAM1
1028	MASP1
1029	DLL4
1030	C5AR1
1031	KIF5B
1032	NSF
1033	P2RY1
1034	LIF
1035	RPS3
1036	TNFRSF4
1037	AIM2
1038	LSM4
1039	PARP9
1040	SLAMF6
1041	DUSP19
1042	HLA-F
1043	ICAM4
1044	RAB33A
1045	KXD1
1046	RAB13
1047	PLEKHM2
1048	BORCS7
1049	BORCS6
1050	BORCS8
1051	MIR27A
1052	MIR149
1053	IPW
1054	LINC02384
1055	SIMALR
1056	MIR3128
1057	MIR3945
1058	ABCC2
1059	IGK
1060	ABL1
1061	RRM1
1062	GUSB
1063	PRDX5
1064	ADAMTS4
1065	CRTC1
1066	NXF1
1067	DSCAM-AS1
1068	MSBP2
1069	PARK7
1070	ADCY3
1071	HK2
1072	CXCL5
1073	IL20
1074	MIR99A
1075	MIR10A
1076	MIR339
1077	MIR425
1078	MIR137
1079	MIR485
1080	MIR95
1081	MIR501
1082	MIR598
1083	TIMP2
1084	IL4R
1085	LONP1
1086	SLC22A1
1087	CDX2
1088	BLVRB
1089	TST
1090	AGFG1
1091	MYO18A
1092	MKRN1
1093	CLEC9A
1094	SNHG15
1095	KIR2DS1
1096	KIR2DS3
1097	MT-TT
1098	SRC
1099	AHCY
1100	TLR7
1101	YY1
1102	PTK2
1103	CD38
1104	PTGER2
1105	DLAT
1106	PPIA
1107	SPHK1
1108	CD1D
1109	CD82
1110	CST3
1111	SLC39A8
1112	TXNRD1
1113	ATN1
1114	DHX9
1115	RALBP1
1116	APLP2
1117	C4B
1118	BHLHE40
1119	TRIM22
1120	CXCL3
1121	IL27RA
1122	LILRB2
1123	NFAT5
1124	KCNN1
1125	DRAM2
1126	BATF2
1127	GLTP
1128	MIR99AHG
1129	PCAT1
1130	MIR532
1131	MIR511
1132	CRMA
1133	SNORD101
1134	SKAP1-AS2
1135	SNORD50A
1136	MIR1178
1137	MIR3125
1138	PCDH15
1139	ITGB3
1140	PIK3C3
1141	PRDX1
1142	YWHAE
1143	ITGAV
1144	OPRM1
1145	CALM1
1146	CANX
1147	FPR1
1148	RELB
1149	TKT
1150	TNFSF13
1151	PIK3R4
1152	POLK
1153	PRDX2
1154	UGT1A6
1155	AGK
1156	SDCBP
1157	CALCOCO2
1158	NEIL1
1159	PDIA6
1160	CGB3
1161	MT-ND2
1162	MT-ND6
1163	HOTAIR
1164	MIR92A2
1165	HCCAT5
1166	SNORD20
1167	SNORD59A
1168	SNORD47
1169	SCARNA14
1170	SNORA12
1171	ELN
1172	MET
1173	PDPK1
1174	TNFAIP3
1175	SLC2A3
1176	CD59
1177	NR1D1
1178	SERPING1
1179	TRAF3
1180	DLL1
1181	ATF3
1182	NLRC4
1183	PMP22
1184	CD5
1185	HDAC11
1186	BST2
1187	LSP1
1188	MSRB2
1189	KSR1
1190	OASL
1191	SAMD9L
1192	IL36A
1193	MIR33A
1194	MIR340
1195	MIR29B2
1196	MIR452
1197	MIR885
1198	KMT2E-AS1
1199	MIR3127
1200	TRP-AGG2-5
1201	MIR665
1202	MIR3605
1203	TRMT61A-DT
1204	TRL-TAG1-1
1205	FGA
1206	FTH1
1207	STAT6
1208	PRKD1
1209	TTR
1210	ACTG1
1211	AHR
1212	NEU1
1213	APEX1
1214	NAT1
1215	PHKA2
1216	PPARA
1217	BAMBI
1218	FCN3
1219	NCOR1
1220	HLCS
1221	MGLL
1222	NAGLU
1223	RPTOR
1224	M6PR
1225	PEX6
1226	ZMPSTE24
1227	QPRT
1228	RIMS2
1229	CCL24
1230	CCL26
1231	POMGNT2
1232	CYP2S1
1233	PDE1A
1234	PGLYRP2
1235	XCL2
1236	DAOA-AS1
1237	MIR376C
1238	MT-TP
1239	TRP-AGG2-6
1240	HLA-S
1241	MOG
1242	TMPRSS6
1243	ASPG
1244	MIR30E
1245	GAS5
1246	C4A
1247	NLGN4X
1248	MYT1L
1249	HLA-DMA
1250	PSD3
1251	C4orf19
1252	RELL1
1253	MIR17HG
1254	HSALNG0049424
1255	RIPOR2
1256	FOXO1
1257	RAD51
1258	ENTPD1
1259	GBA1
1260	TFAP2A
1261	ZEB2
1262	DIABLO
1263	POLB
1264	IRF3
1265	CX3CL1
1266	DPEP1
1267	MARS2
1268	DGKQ
1269	IFITM3
1270	THBS4
1271	ALDH9A1
1272	ATG3
1273	FDX1
1274	GMDS
1275	RECK
1276	SRSF2
1277	ABCG4
1278	NADSYN1
1279	RCN1
1280	SRSF3
1281	VAMP8
1282	VTI1B
1283	ARPC4
1284	ARFGAP1
1285	GTDC1
1286	SGMS1
1287	SH3RF1
1288	TREML2
1289	RNASE7
1290	CCL23
1291	MIR30B
1292	MIR203A
1293	MIR206
1294	MIR212
1295	MIR199B
1296	MIR409
1297	SNORD37
1298	ZFP91-CNTF
1299	MIR1291
1300	TRV-AAC1-4
1301	IFN1@
1302	KLRK1
1303	ABCC1
1304	LTB
1305	UBE2L6
1306	MIR30A
1307	AMH
1308	UPK3A
1309	ZNF77
1310	NRAMP1
1311	BACTS1
1312	BACTS2
1313	CDSIGN
1314	IFG
1315	IFI41
1316	IMD27A
1317	LRG47
1318	NRAMP
1319	SCYA2
1320	TIL4
1321	IFI
1322	IFI1
1323	IFI75
1324	IMD27B
1325	MCP1
1326	IBD19
1327	IMD69
1328	MCAF
1329	VODI
1330	MycB embC
1331	PTGS1
1332	PTGS2
1333	MycB ddl
1334	MycB alr
1335	GRIN1
1336	Stap-coc pbp2
1337	MycB mmpL3
1338	Bact inhA
1339	TOP2A
1340	TOP2B
1341	Bact folP
1342	MycB antigens
1343	MycB Prop
